# Supplementary material for: Rational Design, Synthesis and Preliminary Evaluation of Novel Fusarinine C-Based Chelators for Radiolabeling with Zirconium-89
Source: MDPI journal article supplement (doi:10.3390/biom9030091), 2019-03-06
Supplement: s1 [file s1]

## Supplementary materials

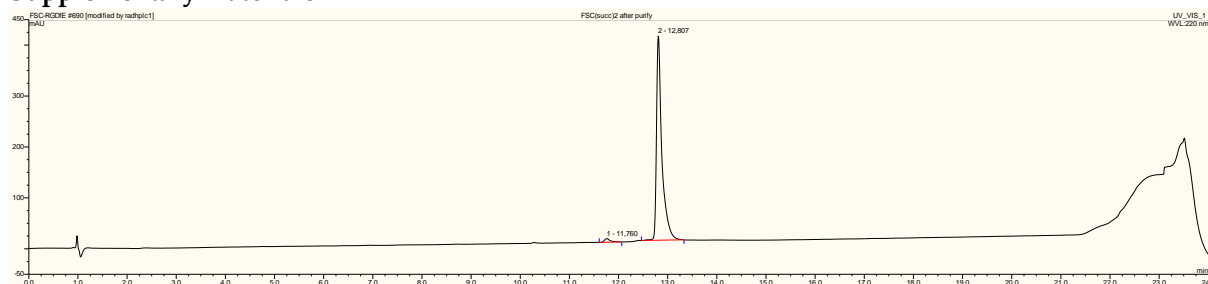

**Figure 1.** HPLC chromatogram of purified FSC(succ)<sub>2</sub>, gradient: 0-2.0 min 0% CH<sub>3</sub>CN/0.1% TFA, 2.0-16.0 min 0-40 % CH<sub>3</sub>CN/0.1% TFA,  $t_R$  = 12.807 min.

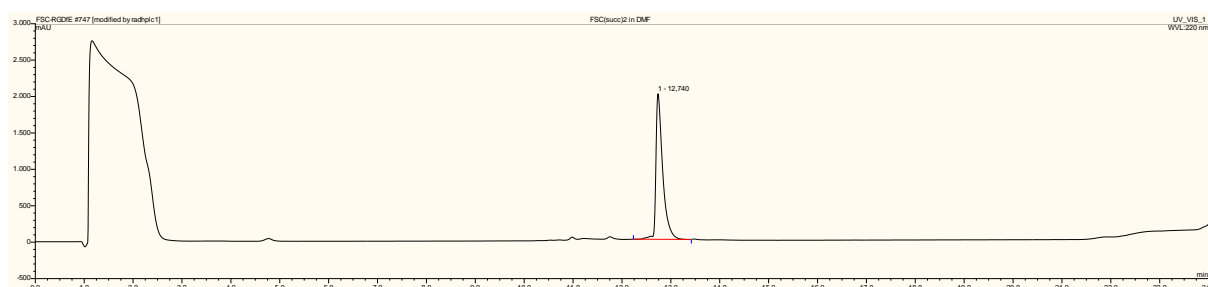

**Figure S2.** HPLC chromatogram of purified FSC(succ)<sub>2</sub>AA, gradient: 0-2.0 min 0% CH<sub>3</sub>CN/0.1% TFA, 2.0-16.0 min 0-40 % CH<sub>3</sub>CN/0.1% TFA,  $t_R$  = 12.740min

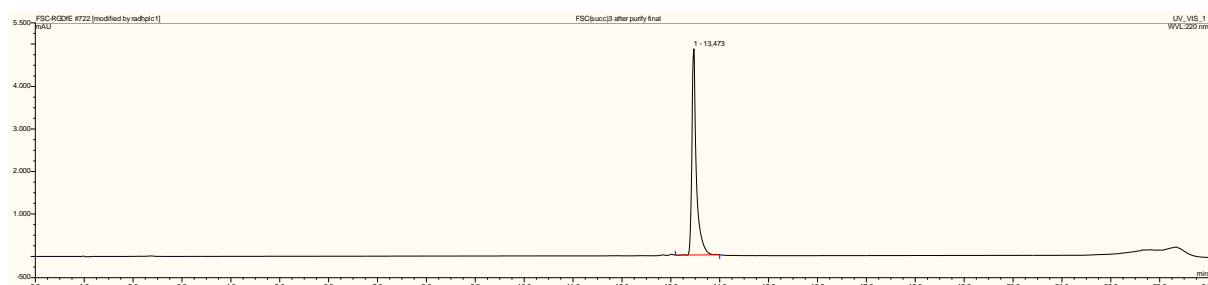

**Figure S3.** HPLC chromatogram of purified FSC(succ)<sub>3</sub>, gradient: 0-2.0 min 0% CH<sub>3</sub>CN/0.1% TFA, 2.0-16.0 min 0-40 % CH<sub>3</sub>CN/0.1% TFA,  $t_R$  = 13.473 min

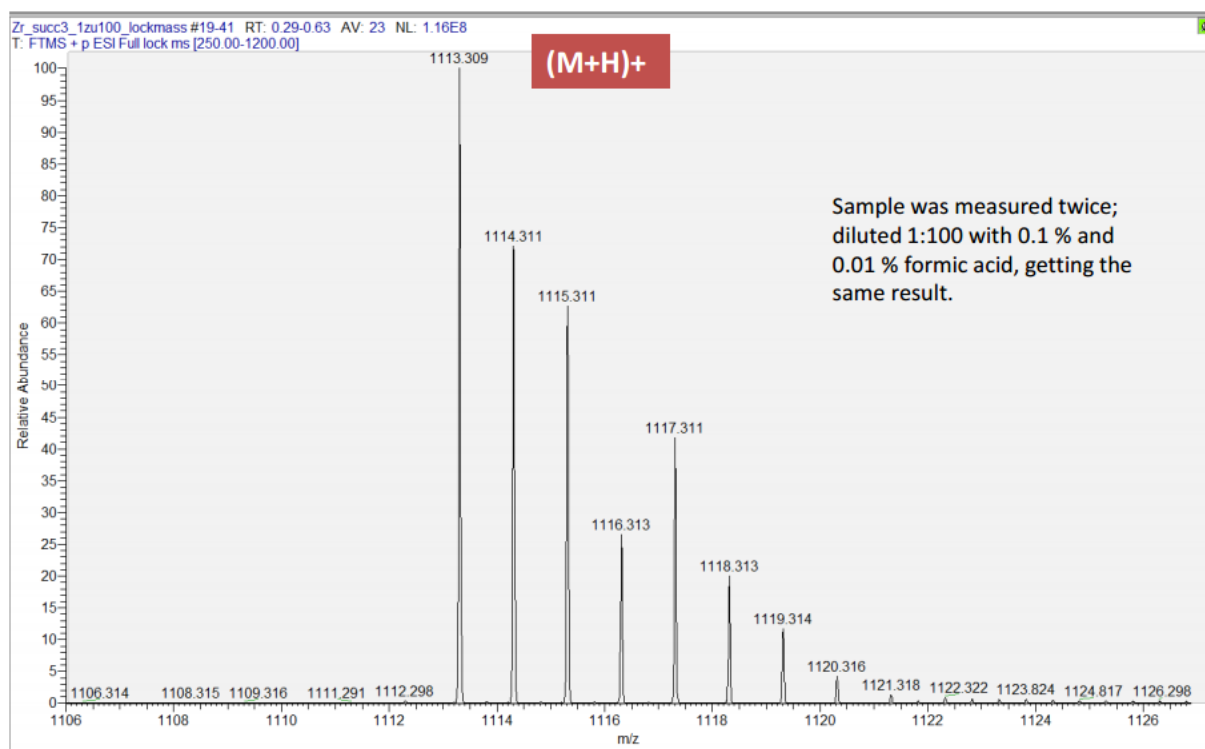

Figure S4. The ESI-MS of [natZr]FSC(succ)<sub>3</sub>

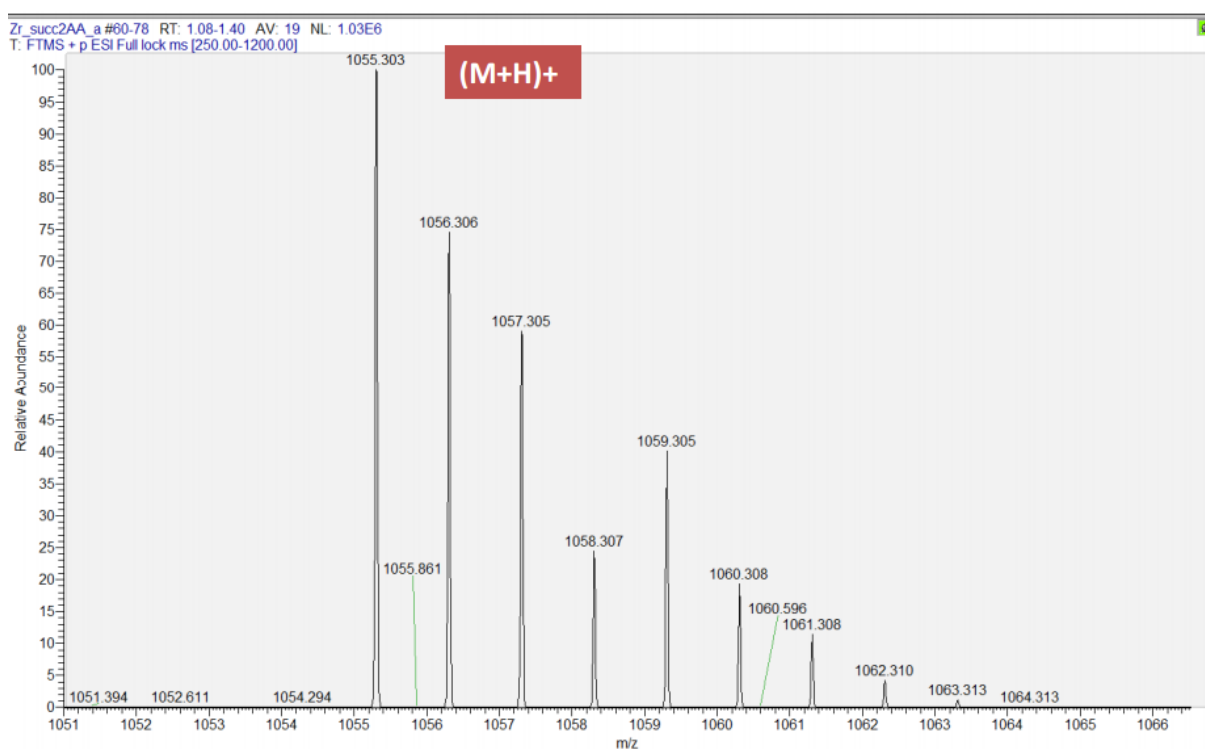

Figure S5. The ESI-MS of [natZr]FSC(succ)<sub>2</sub>AA

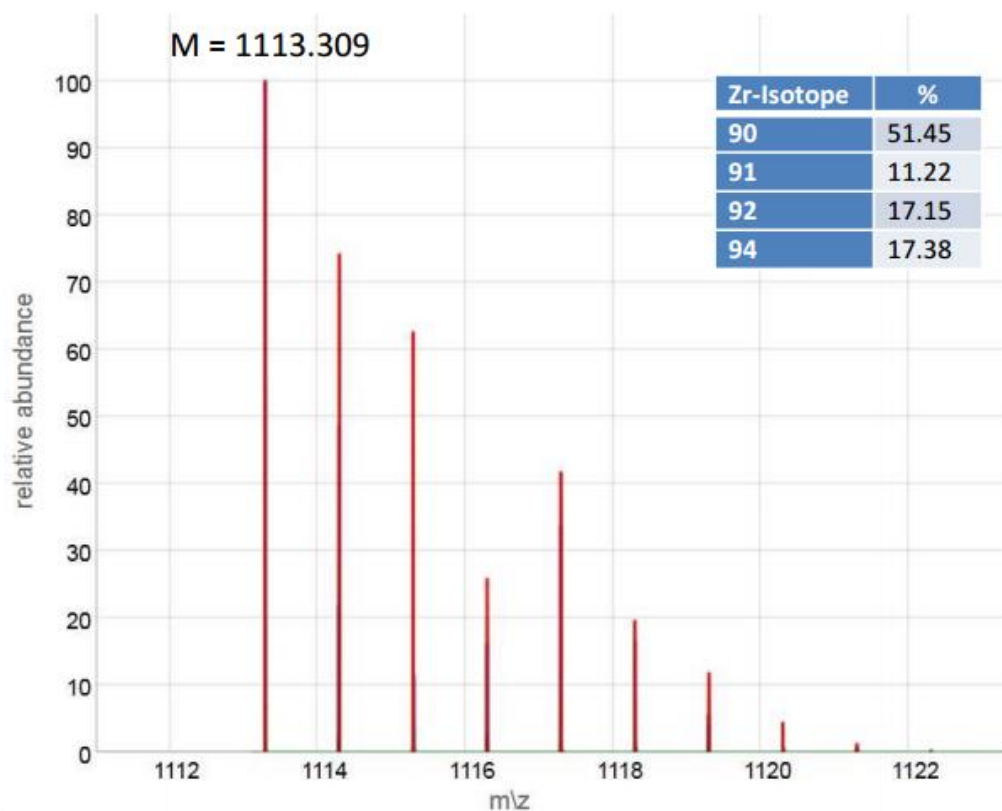

**Figure S6.** The calculated isotope pattern for  $C_{45}H_{63}N_6O_{21}Zr$  ( $[^{nat}Zr]FSC(succ)_3$ )

**Figure S7.** 3D microPET/CT images of  $[^{89}Zr]Zr-FSC(succ)_3$  in a mouse 80min p.i.

**Figure S8.** 3D microPET/CT images of  $[^{89}Zr]Zr-FSC(succ)_3$  in a mouse 24h p.i.

**Figure S9.** 3D microPET/CT images of  $[^{89}Zr]Zr-TAFC$  in a mouse 80min p.i.

**Figure S10.** 3D microPET/CT images of  $[^{89}Zr]Zr-TAFC$  in a mouse 24h p.i.
